# Supplementary material for: Epigenetic modification of miR-141 regulates SKA2 by an endogenous ‘sponge’ HOTAIR in glioma
Source: PubMed Central journal article supplement (PMC5058705; doi:10.18632/oncotarget.8895), 2016-04-21
Supplement: oncotarget-07-30610-s001.pdf [file oncotarget-07-30610-s001.pdf]

## Epigenetic modification of miR-141 regulates SKA2 by an endogenous 'sponge' HOTAIR in glioma

### Supplementary Materials

#### qRT-PCR primers

DNMT1 forward: 5'-CGGCTTCAGCACCTCATTG-3'  
reverse: 5'-AGGTCGAGTCGGAATTGCTC-3'  
HOTAIR Forward: 5'-ACAGTGGCACCGCTTTTCTA-3  
Reverse: 5'-GCAGGGTCCCACTGCATAAT-3  
SKA2: Forward: 5'-CCGCTTTAAACCAGTTGCTG-3',  
Reverse: 5'-CTCTGCCGCAGTTTTCTCTT-3'.  
GAPDH Forward: 5'-AGCAAGAGCACAAGAGGAAG-3'  
Reverse: 5'-GGTTGAGCACAGGGTACTTT-3'.  
miR-141 forward, 5'-CAUCUCCAGUACAGUGUUGGA-3'  
U6 forward, 5'-CTCGCTTCGGCAGCACA-3'

#### siRNA for HOTAIR, DNMT1 or SKA2

si-HOTAIR, 5'-AAUU-CUAAAUUGGGCUGG-3'  
si-DNMT1, 5'-GGGACUGUGUCUCUGUUAUTT-3'  
5'-AUAACAGAGACACAGUCCCTT-3'  
si-SKA2: 5'-AAGAAATCAAGACTAATCATCTT-3'.

#### To clone HOTAIR

sense: 5'-CATGGATCCACATTCTGCCCTGATTTCCGGAACC-3'  
antisense: 5'-ACTCTCGAGCCACCACACACACAACCTACAC-3'
